# Supplementary material for: SMARCB1 loss activates patient-specific distal oncogenic enhancers in malignant rhabdoid tumors
Source: PubMed Central journal article supplement (PMC10692191; doi:10.1038/s41467-023-43498-3), 2023-12-01
Supplement: 41467_2023_43498_MOESM3_ESM.pdf [file 41467_2023_43498_MOESM3_ESM.pdf]

### **Description of Additional Supplementary Files**

File Name: Supplementary Data 1

Description: Overview of PDO samples and sequencing techniques

File Name: Supplementary Data 2

Description: Ranked differential chromatin loops of HiC and their putative gene target

File Name: Supplementary Data 3

Description: Overview of used publicly available data sets.

File Name: Supplementary Data 4

Description: MRT tissues used for single-cell multiome analysis.
